# Supplementary material for: Effect of the Post-Harvest Processing on Protein Modification in Green Coffee Beans by Phenolic Compounds
Source: MDPI journal article supplement (doi:10.3390/foods11020159), 2022-01-08
Supplement: s1 [file s1]

## **Supplementary Material**

### **Effect of the post-harvest processing on the protein modification in green coffee beans by phenolic compounds**

**Gustavo A. Figueroa Campos <sup>1</sup>, Johannes G. K. T. Kruizenga <sup>1</sup>, Sorel Tchewonpi Sagu <sup>1</sup>, Thomas Homann <sup>1</sup>, Andreas Taubert <sup>2</sup>, Harshadrai M. Rawel <sup>1,\*</sup>**

<sup>1</sup>Institute of Nutritional Science, University of Potsdam, Arthur-Scheunert-Allee 114-116, 14558 Nuthetal Germany; [figueroacamp@uni-potsdam.de](mailto:figueroacamp@uni-potsdam.de) (G.A.F.C.), [johanneskruizenga@web.de](mailto:johanneskruizenga@web.de) (J.G.K.T.K.), [sorelsagu@uni-potsdam.de](mailto:sorelsagu@uni-potsdam.de) (S.T.S), [homann@uni-potsdam.de](mailto:homann@uni-potsdam.de) (T.H.)

<sup>2</sup>Institute of Chemistry, University of Potsdam, Karl-Liebknecht-Str. 24–25, 14476 Potsdam, Germany; [ataubert@uni-potsdam.de](mailto:ataubert@uni-potsdam.de) (A.T.)

\* Corresponding author.

Tel: +49-33200-88-5525/5578 (H.M.R.)

E-mail: [rawel@uni-potsdam.de](mailto:rawel@uni-potsdam.de)

## **Content**

**Figure S1.** Schematic flowchart of the three protein extraction protocols used. RC are samples from Rio Colorado; SF are samples from Santa Sofia; DPM are samples from different processing method; TCEP the reducing agent tris(2-carboxyethyl)phosphine and IAA the alkylation agent iodoacetamide

**Figure S2.** Alignment of the data available for 11S-CA from the UniProt database

**Figure S3.** Predicted structures of modifications by chlorogenic acid (CQA)

**Figure S4.** Comparison of fluorescence emission spectra of protein extracts. Results are presented as mean  $\pm$  standard deviation ( $n = 3$ ) as area under the curve (AUC). 1:1260 dilutions of the extracts dissolved in urea extraction buffer were excited at 360 nm light wavelength using fluorospectrometer and emission was measured between 300 and 500 nm. Extraction option I used PVPP, while extraction option II and III each used SDS. For the photo, 0.5 mL was pipetted onto a weighing dish in each case. Different letters indicate significant difference ( $p < 0.05$ , ANOVA, Tukey test).

**Figure S5.** Data of MALDI-TOF-MS measurements of the in-gel digested proteins (a) Sequence coverage of peptic and tryptic in-gel digestion; (b) sequence coverage after extraction with options I and II. Data is expressed as means  $\pm$  standard deviation ( $n = 3$ ). Partially describe the incompletely digestion peptide based on the number of unused interfaces that are contained in the fragment spectrum of the in-silico digestion.

**Table S1.** Analyzed mass transitions of the P93079 sequence of the 11S protein



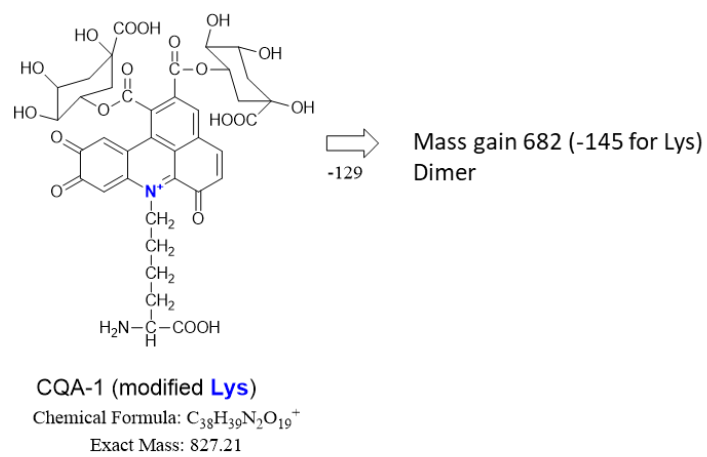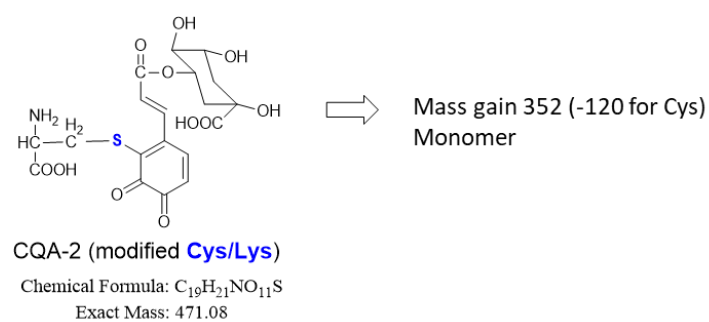

**Figure S3.** Predicted structures of modifications by chlorogenic acid (CQA)

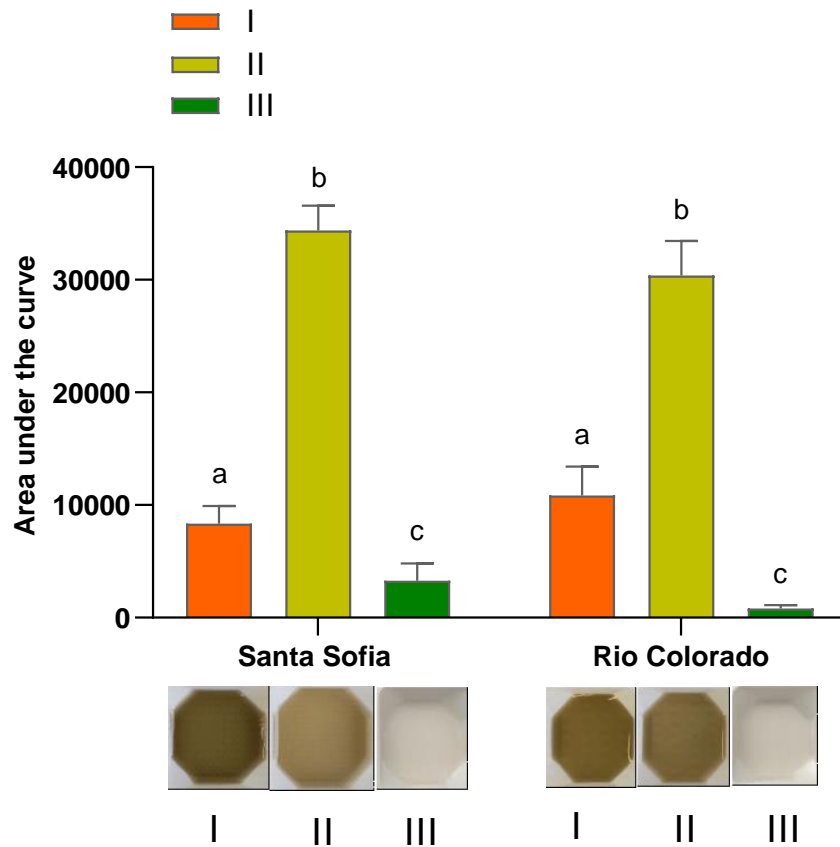

**Figure S4.** Comparison of fluorescence emission spectra of protein extracts. Results are presented as mean  $\pm$  standard deviation ( $n = 3$ ) as area under the curve (AUC). 1:1260 dilutions of the extracts dissolved in urea extraction buffer were excited at 360 nm light wavelength using fluorospectrometer and emission was measured between 300 and 500 nm. Extraction option I used PVPP, while extraction option II and III each used SDS. For the photo, 0.5 mL was pipetted onto a weighing dish in each case. Different letters indicate significant difference ( $p < 0.05$ , ANOVA, Tukey test).

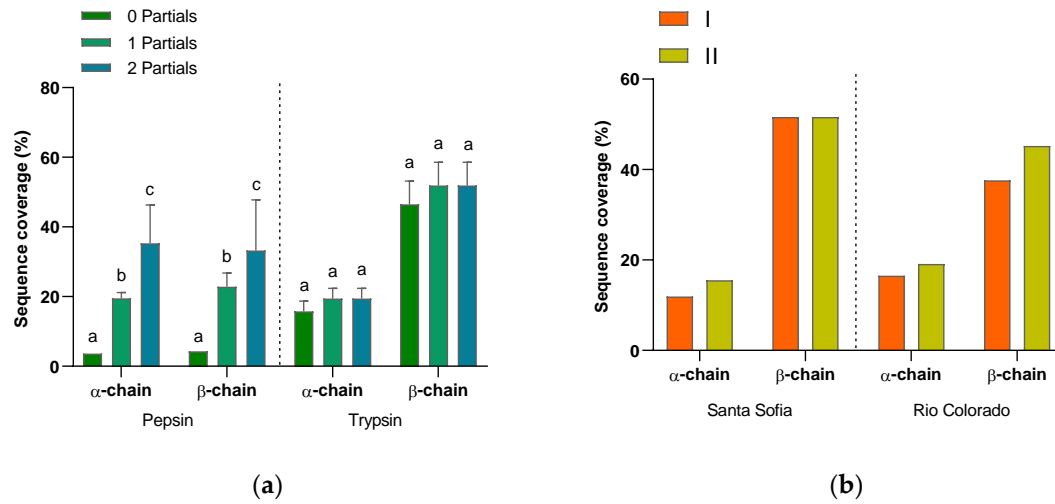

**Figure S5.** Data of MALDI-TOF-MS measurements of the in-gel digested proteins (a) Sequence coverage of peptic and tryptic in-gel digestion; (b) sequence coverage after extraction with options I and II. Data is expressed as means  $\pm$  standard deviation ( $n = 3$ ). Partials describe the incompletely digestion peptide based on the number of unused interfaces that are contained in the fragment spectrum of the in-silico digestion. Different letters indicate significantly different values for each group (different superscript letters indicate a significant different,  $p < 0.05$ , ANOVA, Tukey's test)

**Table S1.** Analyzed mass transition of the P93079 sequence of the 11S protein

|                                               | $\alpha$ -chain peptide sequence | Q1 (m/z) | Q3 (m/z)                                           | Retention time (min) |
|-----------------------------------------------|----------------------------------|----------|----------------------------------------------------|----------------------|
| Without modification of the lysine side chain | R.LGGK.T                         | 187.6    | 261.1<br>204.1<br>147.1                            | 4.2                  |
|                                               | K.TQCNIQK.L                      | 446.2    | 662.3<br>502.3<br>388.3<br>275.2<br>147.1          | 11.5                 |
|                                               | K.LNAQEPSFR.F                    | 531.3    | 834.4<br>763.4<br>635.3<br>506.3<br>409.2<br>322.2 | 14.2                 |
|                                               | R.NTVQPK.G                       | 343.7    | 572.3<br>471.3<br>372.2                            | 11.1                 |
|                                               | R.LPHYSNVPK.F                    | 527.8    | 941.5<br>707.4<br>544.3<br>457.3<br>343.2          | 13.3                 |
|                                               | K.GQEGSK.G                       | 303.1    | 548.3<br>420.2<br>291.2<br>234.1<br>147.1          | 12.2                 |
|                                               | R.FQK.G                          | 211.6    | 275.2<br>147.1                                     | 8.8                  |
|                                               | K.FFLAGMPQQGGK.E                 | 660.8    | 785.4<br>671.3<br>574.3<br>446.2<br>318.2          | 15.4                 |
|                                               | K.IIQK.L                         | 251.2    | 388.3<br>275.5<br>147.1                            | 11.2                 |
|                                               | R.LGGK.T                         | 363.7    | 613.2<br>556.2<br>499.2                            | 12.4                 |
|                                               | R.LPHYSNVPK.F                    | 703.8    | 1293.6<br>896.4<br>809.4<br>695.3                  | 15.8                 |
|                                               | K.GQEGSK.G                       | 479.1    | 772.3<br>643.2<br>586.2<br>499.2                   | 16.3                 |
|                                               | K.FFLAGNPQQGGK.E                 | 836.9    | 1137.5<br>1023.4<br>926.4<br>798.3<br>670.3        | 20.4                 |
|                                               | K.IIQK.L                         | 427.2    | 740.3<br>627.3<br>499.2                            | 14.3                 |
| CQA-Lysin adducts                             | R.LGGK.T                         | 528.7    | 943.3<br>886.3<br>829.2                            | 15.4                 |
|                                               | K.TQCNIQK.L                      | 787.3    | 1344.4<br>1184.4<br>1070.4<br>957.3<br>829.2       | 14.9                 |
| diCQA-Lysin adducts                           |                                  |          |                                                    |                      |
|                                               |                                  |          |                                                    |                      |
|                                               |                                  |          |                                                    |                      |

**Table S1.** Cont.

| $\beta$ -chain peptide sequence | Q1 (m/z) | Q3 (m/z)                                                    | Retention time (min) |
|---------------------------------|----------|-------------------------------------------------------------|----------------------|
| K.LSEMIGLPQEADVFNPR.A           | 950.0    | 1172.6<br>632.4<br>386.2                                    | 16.8                 |
| R.ITTVNSQK.I                    | 445.8    | 676.4<br>575.3<br>476.2<br>362.2<br>529.3<br>616.3          | 11.9                 |
| K.IPILSSLQLSAER.G               | 713.9    | 1313.7<br>903.5<br>816.5<br>703.4<br>575.3<br>462.2         | 17.4                 |
| R.IQVVDHK.G                     | 419.7    | 597.3<br>498.3<br>399.2<br>440.3<br>555.3                   | 12.4                 |
| K.VFDDEVK.Q                     | 426.2    | 605.3<br>490.3<br>375.2<br>477.2<br>606.2                   | 13.8                 |
| K.AGNEGFEYVAFK.T                | 666.3    | 903.5<br>756.4<br>627.4<br>464.4<br>365.2                   | 16.2                 |
| K.TNDNAMINPLVGR.L               | 707.9    | 899.5<br>768.4<br>655.4<br>541.3                            | 15.9                 |
| R.LSALR.A                       | 280.2    | 446.3<br>359.2<br>175.1                                     | 13.3                 |
| R.AIPEEVLR.S                    | 463.8    | 742.4<br>645.4<br>516.3                                     | 15.1                 |
| R.SSFQISSEEAELK.Y               | 792.4    | 934.4<br>847.4<br>718.3<br>589.3<br>518.2<br>389.2          | 15.4                 |
| R.QEALLLSEQSQQGK.R              | 779.9    | 891.4<br>804.4<br>675.3<br>547.3<br>460.3<br>442.2<br>668.4 | 15.0                 |

Without modification of the lysine side chain



**Table S1.** Cont.

|                     | $\beta$ -chain peptide sequence | Q1 (m/z) | Q3 (m/z) | Retention time (min) |
|---------------------|---------------------------------|----------|----------|----------------------|
| CQA-Lysin adducts   | K.VFDDEVK.Q                     | 602.3    | 727.3    | 17.0                 |
|                     |                                 |          | 598.3    |                      |
|                     |                                 |          | 499.2    |                      |
|                     |                                 |          | 477.2    |                      |
|                     |                                 |          | 606.2    |                      |
| diCQA-Lysin adducts | R.ITTVNSQK.I                    | 786.8    | 1044.3   | 14.9                 |
|                     |                                 |          | 957.3    |                      |
|                     |                                 |          | 829.3    |                      |
|                     |                                 |          | 529.3    |                      |
|                     |                                 |          | 626.3    |                      |
